# Supplementary material
Source: publisher figshare collection journal article supplement (https://sage.figshare.com/ndownloader/files/23553686)
Supplement: Supplementary file 1 [file 23553686]

## Sheet: Foglio1
Shaping Mediterranean landscapes: the cultural impact of anthropogenic fires in Tyrrhenian southern Tuscany during the Iron and Middle Ages (800-450 BC / AD 650-1300) Mauro Paolo Buonincontri, Pierluigi Pieruccini, Davide Susini, Carmine Lubritto, Paola Ricci, Fabian Rey, Willy Tinner, Daniele Colombaroli, Ruth Drescher-Schneider, Luisa Dallai, Lorenzo Marasco, Giulio Poggi, Giovanna Bianchi, Ric…
Supplementary Table 2. Carpological remains from the palaeochannel of the Pecora river. Absolute values grouped by sediment samples.
Sedimentary facies		4.3	4.2		4.1
Sample code		2.1	2.2	2.3	7
Cereals
Hordeum vulgare	Hulled caryopsis			1
Triticum aestivum/durum	Caryopsis	1
Triticum cf. dicoccum	Caryopsis			1
Triticum monococcum	Caryopsis				1
Weeds
cf. Vicia	Seed		1
cf. Avena	Lemma base			1
Poaceae undiff.	Glume fragm.			1
